# Supplementary material
Source: Springer Nature journal article supplement (https://www.springermedizin.de/resource/supplementary/12872_2011_451_MOESM1_ESM.pdf/9430022)
Supplement: MOESM1 [file 9430022]

## Enrollment

(Assessed for eligibility (n=150

(Excluded (n= 70  
◆ Not meeting inclusion criteria (n=50  
◆ Declined to participate (n= 15  
◆ Other reasons (n=5

(Randomized (n= 80

## Allocation

Allocated to intervention (n=40)  
(◆ Received allocated intervention (n= 40  
◆ Did not receive allocated intervention  
( (give reasons) (n= 0

Allocated to intervention (n=40)  
(◆ Received allocated intervention (n=40  
◆ Did not receive allocated intervention  
( (give reasons) (n= 0

## Follow-Up

Lost to follow-up (give reasons) (n= 0)  
Discontinued intervention (give reasons) (n=0)

Lost to follow-up (give reasons) (n=0)  
Discontinued intervention (give reasons)  
(n=0)

## Analysis

Analysed (n=40)  
◆ Excluded from analysis (give reasons)  
(n=0)

Analysed (n=40)  
◆ Excluded from analysis (give reasons)  
(n=0)
